# Supplementary material for: Nationwide Comparison of Surgical and Oncologic Outcomes in Endometrial Cancer Patients Undergoing Robotic, Laparoscopic, and Open Surgery: A Population-Based Cohort Study
Source: PubMed Central journal article supplement — Cancer Res Treat. 2020 Oct 22;53(2):549–57. doi: 10.4143/crt.2020.802 (PMC8053860; doi:10.4143/crt.2020.802), 2020-10-22
Supplement: crt-2020-802-suppl.pdf [file crt-2020-802-suppl.pdf]

**S1 Table.** Subgroup analysis of univariate and multivariate hazard ratio for overall death according to risk group

| Variable                 | High risk                   |         |                               |         | Low risk                    |         |                               |         |
|--------------------------|-----------------------------|---------|-------------------------------|---------|-----------------------------|---------|-------------------------------|---------|
|                          | IPTW-adjusted univariate HR |         | IPTW-adjusted multivariate HR |         | IPTW-adjusted univariate HR |         | IPTW-adjusted multivariate HR |         |
|                          | HR (95% CI)                 | p-value | HR (95% CI)                   | p-value | HR (95% CI)                 | p-value | HR (95% CI)                   | p-value |
| Index surgery            |                             |         |                               |         |                             |         |                               |         |
| OS                       | -                           |         | -                             |         | -                           |         | -                             |         |
| RS                       | 0.614 (0.280-1.346)         | 0.223   | 0.635 (0.290-1.394)           | 0.258   | 0.101 (0.024-0.421)         | 0.002   | 0.104 (0.025-0.434)           | 0.002   |
| LS                       | 0.658 (0.471-0.919)         | 0.014   | 0.626 (0.447-0.875)           | 0.006   | 0.489 (0.366-0.652)         | <0.001  | 0.484 (0.363-0.646)           | <0.001  |
| Age group (yr)           |                             |         |                               |         |                             |         |                               |         |
| < 55                     | -                           |         | -                             |         | -                           |         | -                             |         |
| ≥ 55                     | 1.554 (1.072-2.254)         | 0.020   | 1.574 (1.083-2.287)           | 0.017   | 3.685 (2.628-5.167)         | <0.001  | 3.612 (2.575-5.067)           | <0.001  |
| Health Insurance         |                             |         |                               |         |                             |         |                               |         |
| Health Insurance         | -                           |         | -                             |         | -                           |         | -                             |         |
| Medical Aid              | 1.246 (0.565-2.745)         | 0.586   |                               |         | 1.319 (0.533-3.261)         | 0.549   |                               |         |
| Income level             |                             |         |                               |         |                             |         |                               |         |
| High (> 25th percentile) | -                           |         | -                             |         | -                           |         | -                             |         |
| Low (≤ 25th percentile)  | 0.860 (0.604-1.226)         | 0.404   |                               |         | 1.018 (0.743-1.395)         | 0.911   |                               |         |
| mCCI score               |                             |         |                               |         |                             |         |                               |         |
| 0-1                      | -                           |         | -                             |         | -                           |         | -                             |         |
| ≥2                       | 1.633 (1.183-2.254)         | 0.003   | 1.612 (1.167-2.227)           | 0.004   | 1.454 (1.092-1.937)         | 0.011   | 1.351 (1.014-1.801)           | 0.040   |
| Hysterectomy year        |                             |         |                               |         |                             |         |                               |         |
| 2012-2014                | -                           |         | -                             |         | -                           |         | -                             |         |
| 2015-2016                | 0.887 (0.594-1.326)         | 0.559   |                               |         | 1.372 (0.981-1.917)         | 0.064   |                               |         |
| Geographical location    |                             |         |                               |         |                             |         |                               |         |
| Metropolitan             | -                           |         | -                             |         | -                           |         | -                             |         |
| Other                    | 0.729 (0.522-1.018)         | 0.063   |                               |         | 1.044 (0.768-1.420)         | 0.784   |                               |         |

CI, confidence interval; HR, hazard ratio; IPTW, inverse probability of treatment weighting; LS, laparoscopic surgery; mCCI, modified Charlson comorbidity index; OS, open surgery; RS, robotic surgery.
